# Supplementary material for: pH- and temperature-responsive supramolecular assemblies with highly adjustable viscoelasticity: a multi-stimuli binary system
Source: Royal Society of Chemistry journal article supplement (doi:10.1039/d3sm00549f), 2023-01-01
Supplement: d3sm00549f1.pdf [file d3sm00549f1.pdf]

## Supporting Information

### **pH- and Temperature-Responsive Supramolecular Assemblies with Highly Adjustable Viscoelasticity: A Multi-Stimuli Binary System**

Yu-Ting Lin <sup>a,†</sup>, Shuhao Liu <sup>a,†</sup>, Bhargavi Bhat <sup>a</sup>, Kai-Yuan Kuan <sup>b</sup>, Wentao Zhou<sup>a</sup>, Ignacio Jose Cobos <sup>a</sup>, Joseph 4 Sang-Il Kwon <sup>a,c</sup>, Mustafa E. S. Akbulut <sup>a,c,d\*</sup>

<sup>a</sup> *Artie McFerrin Department of Chemical Engineering, Texas A&M University, College Station, TX 77843, USA*

<sup>b</sup> *Department of Chemistry, Texas A&M University, College Station, TX 77843, USA*

<sup>c</sup> *Texas A&M Energy Institute, College Station, TX 77843, USA*

<sup>d</sup> *Department of Materials Science and Engineering, Texas A&M University, College Station, TX 77843, USA*

\* Corresponding author. *E-mail address:* makbulut@tamu.edu (M. Akbulut).

† Both authors contributed equally to this work.

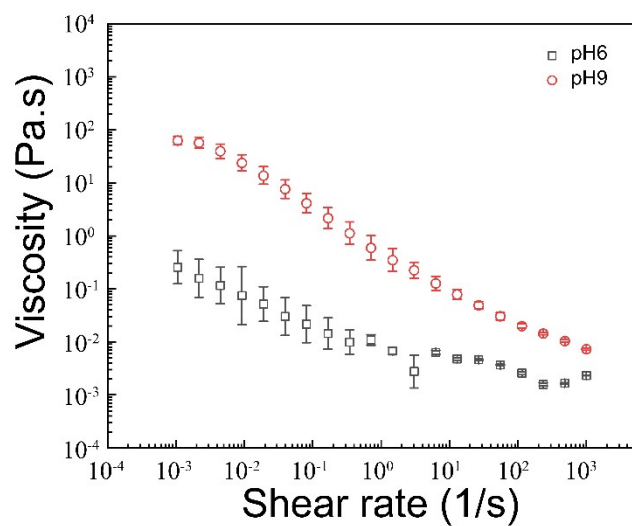

**Figure S1.** (The effect of pH on the viscosity of HAA solution at pH 6 and at pH 9. For all data, the solution involved a 30 mM HAA at room temperature.

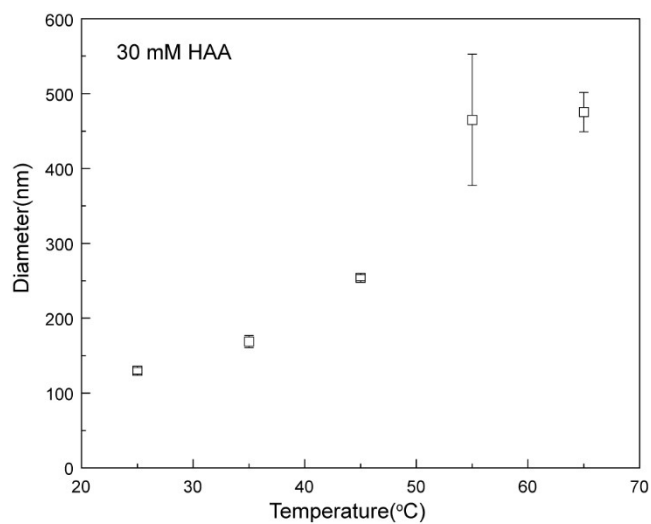

**Figure S2.** Hydrodynamic diameter of 30 mM HAA as a function of temperature measured with dynamic light scattering.

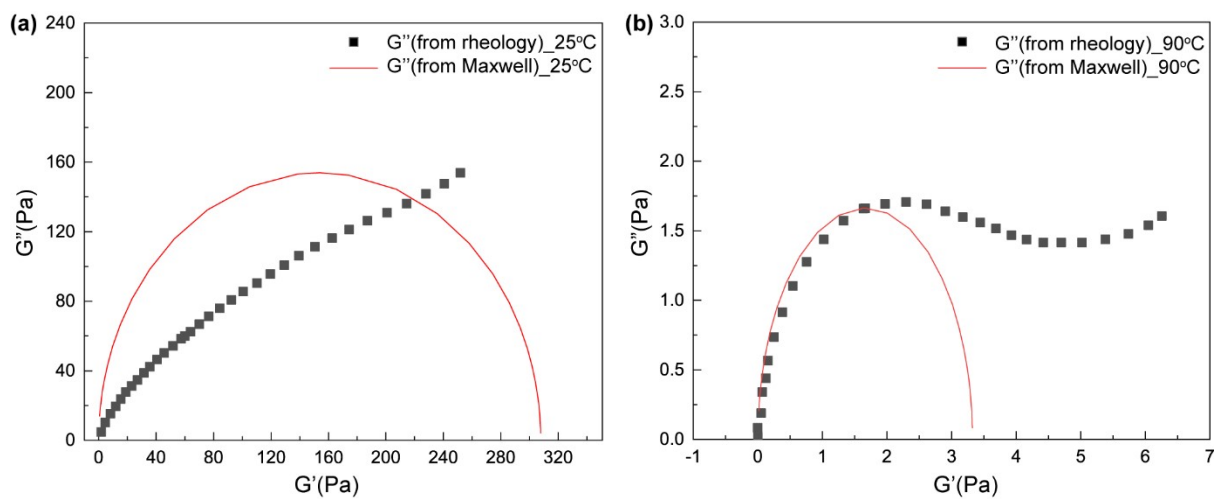

**Figure S3.** Cole-Cole plot of the binary supramolecular assembly at pH 6 and (a) 25 °C (b) 90 °C.

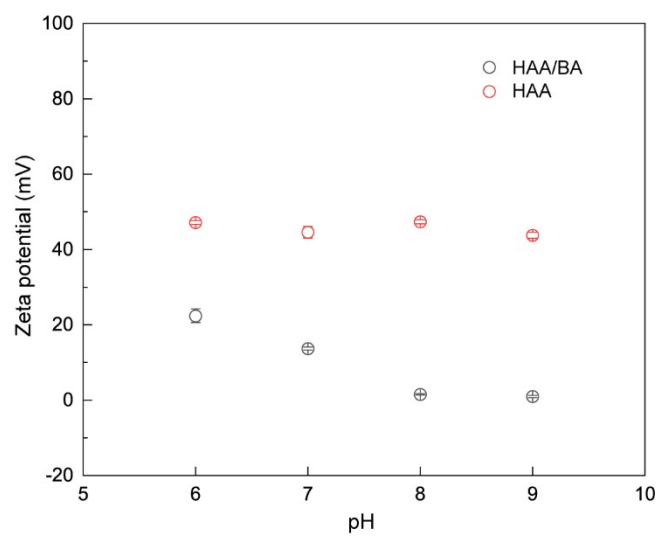

**Figure S4.** Zeta potential of HAA/BA and HAA with respect to pH.

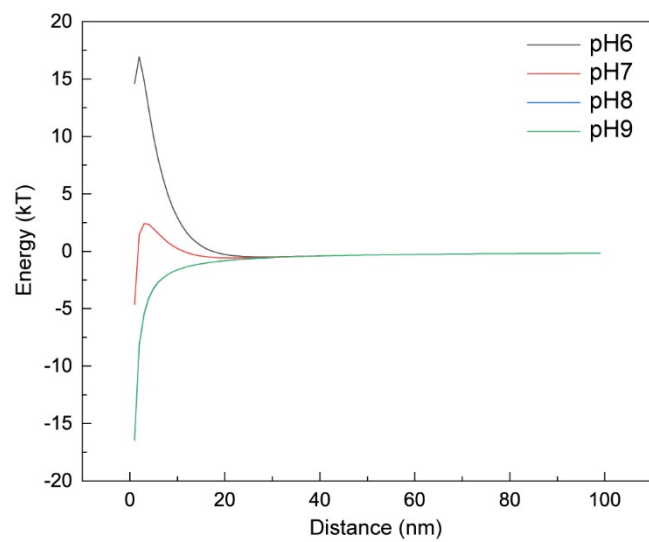

**Figure S5.** Energy distance profile of HAA/BA at pH 6 to pH 9.

**Table S1.** The fit parameters for Cross model at pH 6 with respect to temperature.

| <b>pH 6</b>  | <b><math>\mu_0</math></b> | <b><math>\mu_\infty</math></b> | <b><math>\lambda</math></b> | <b><math>m</math></b> |
|--------------|---------------------------|--------------------------------|-----------------------------|-----------------------|
| <b>25 °C</b> | 0.1                       | 0.00352                        | 101.0                       | 0.4                   |
| <b>30 °C</b> | 53.9                      | 0.01915                        | 43.9                        | 0.9                   |
| <b>35 °C</b> | 61.1                      | 0.01832                        | 40.1                        | 0.9                   |
| <b>40 °C</b> | 155.3                     | 0.01833                        | 73.4                        | 0.9                   |
| <b>45 °C</b> | 62.0                      | 0.01348                        | 38.4                        | 0.9                   |
| <b>50 °C</b> | 14.8                      | 0.0086                         | 69.2                        | 0.9                   |
| <b>55 °C</b> | 13.1                      | 0.00413                        | 119.9                       | 0.7                   |
| <b>60 °C</b> | 0.5                       | 0.00314                        | 6.8                         | 0.6                   |
| <b>65 °C</b> | 1.6                       | 0.00169                        | 12.4                        | 0.5                   |
| <b>70 °C</b> | 0.5                       | 0.00348                        | 18.7                        | 0.7                   |
| <b>75 °C</b> | 0.5                       | 0.0032                         | 4.9                         | 0.8                   |
| <b>80 °C</b> | 0.1                       | 0.0041                         | 0.2                         | 1.3                   |
| <b>85 °C</b> | 0.1                       | 0.00343                        | 0.8                         | 0.8                   |
| <b>90 °C</b> | 0.3                       | 0.00383                        | 4.8                         | 0.5                   |

**Table S2.** The fit parameters for Cross model at pH 9 with respect to temperature.

| <b>pH 9</b>  | <b><math>\mu_0</math></b> | <b><math>\mu^\infty</math></b> | <b><math>\lambda</math></b> | <b><b>m</b></b> |
|--------------|---------------------------|--------------------------------|-----------------------------|-----------------|
| <b>25 °C</b> | 1091.0                    | 0                              | 1603.0                      | 1.0             |
| <b>30 °C</b> | 1525.0                    | 0                              | 853.0                       | 0.9             |
| <b>35 °C</b> | 1201.0                    | 5.13E-04                       | 856.0                       | 0.9             |
| <b>40 °C</b> | –                         |                                | –                           | –               |
| <b>45 °C</b> | 2570.1                    | 0.0311                         | 70.1                        | 1.0             |
| <b>50 °C</b> | 1631.3                    | 0.0067                         | 96.9                        | 1.1             |
| <b>55 °C</b> | 815.7                     | 0.01087                        | 31.0                        | 1.3             |
| <b>60 °C</b> | 889.5                     | 0.00241                        | 46.9                        | 1.2             |
| <b>65 °C</b> | –                         |                                | –                           | –               |
| <b>70 °C</b> | –                         |                                | –                           | –               |
| <b>75 °C</b> | 309.8                     | 0.00908                        | 15.7                        | 1.3             |
| <b>80 °C</b> | –                         |                                | –                           | –               |
| <b>85 °C</b> | 1.0                       | 0.00523                        | 13.4                        | 0.8             |
| <b>90 °C</b> | 1.4                       | 0.00455                        | 4.4                         | 0.8             |



**Table S3.** The hydrodynamic size of HAA/BA supramolecular assemblies at varying temperatures.

| <b>Temperature (°C)</b> | <b>Sample1</b> | <b>Sample2</b> | <b>Sample3</b> | <b>Average</b> |
|-------------------------|----------------|----------------|----------------|----------------|
| <b>25</b>               | 490.6          | 571.5          | 662.6          | 574.9          |
| <b>40</b>               | 686.6          | 825.8          | 886.9          | 799.8          |
| <b>55</b>               | 250.9          | 248            | 255.1          | 251.3          |
